# Supplementary material
Source: PubMed Central journal article supplement (PMC3720149)
Supplement: supp_13-11872_IOVS-13-11872-s01.pdf [file supp_13-11872_IOVS-13-11872-s01.pdf]

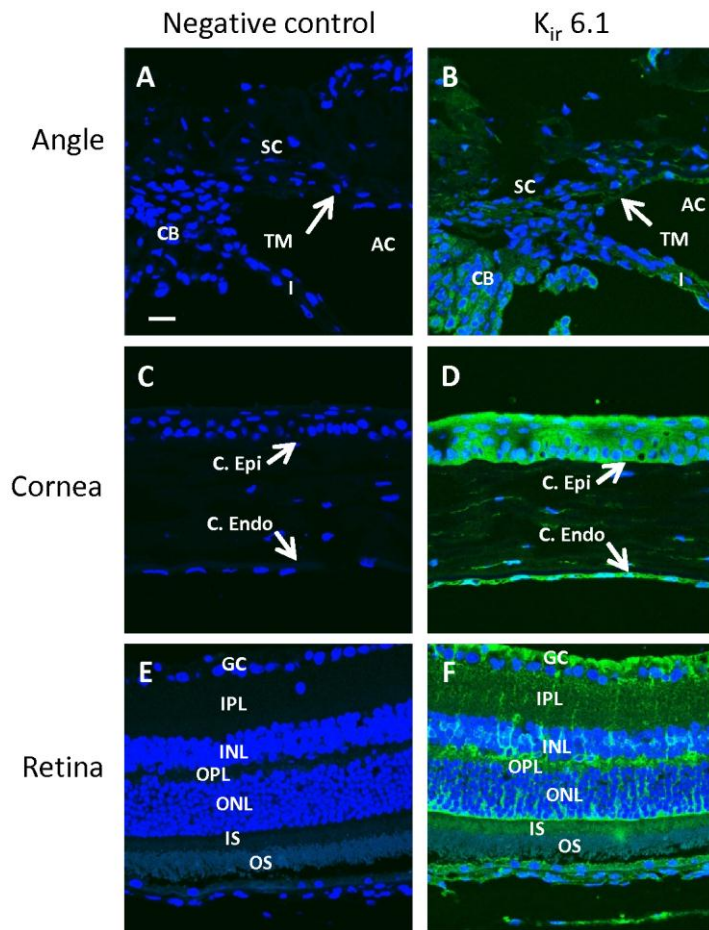

**Supplementary Figure 1.**  $K_{ir}6.1$  subunit expression in ocular tissues of  $K_{ir}6.2^{-/-}$  mice (A-F). Similar to wild type mice,  $K_{ir}6.1$  was found to be expressed in multiple eye tissues including trabecular meshwork, inner and outer wall of Schlemm's canal (B), corneal epithelium, endothelium and parts of stroma (D) and various cell layers of retina (F). The corresponding negative controls, which were incubated with secondary antibody only, were used to set the fluorescent intensities of the images (A,C,E). C.Epi, corneal epithelium; C.Endo, corneal endothelium; SC, Schlemm's canal; TM, trabecular meshwork; CB, ciliary body; I, Iris; AC, anterior chamber; GC, ganglion cells; IPL, inner plexiform layer; INL, inner nuclear layer; OPL, outer plexiform layer; ONL, outer nuclear layer; IS, inner segments; OS, outer segments. Green fluorescence,  $K_{ir}6.1$ ; Blue fluorescence, DAPI. Scale bar, 20  $\mu\text{m}$  (for all micrographs).
